# Supplementary material
Source: PubMed Central journal article supplement (PMC3872184)
Supplement: supp_113.156745_156745SI.pdf [file supp_113.156745_156745SI.pdf]

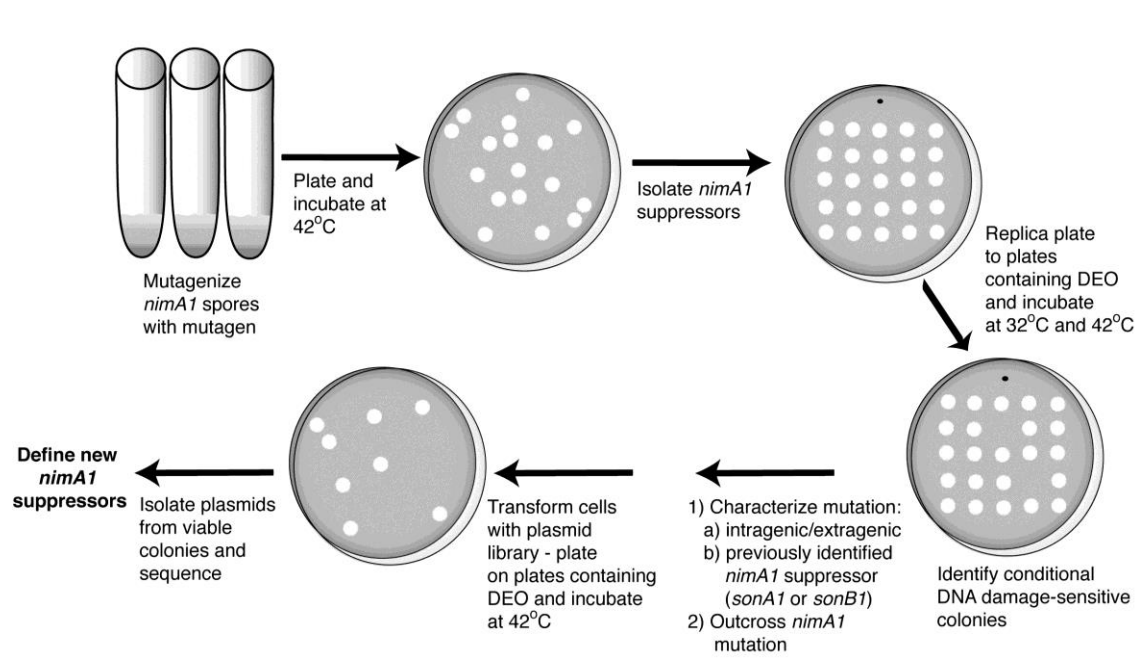

**Figure S1** Methods used to identify conditional drug-sensitive suppressors of *nimA1*. Diagram of the genetic screen performed and the general steps involved to identify suppressors of *nimA1* temperature sensitivity.

**Figure S2** ClustalW alignment (<http://workbench.sdsc.edu>) of SonC and its orthologs. Identical (\*), conserved strong groups (:), and conserved weak groups (.) are indicated. Accession numbers for the sequences are: *A. nidulans* (AN1232; *Aspergillus* Genome Database, <http://www.aspgd.org/07-16-13>), *Penicillium chrysogenum* (Pc16g03990), *Coccidioides immitis* (CIMG\_10322), *Bipolaris maydis* (COCC4DRAFT\_161203, Δ641-688), *Sclerotinia sclerotiorum* (SS1G\_09964), *Fusarium oxysporum* (FOXb\_15136, Δ1-67), *Trichoderma reesei* (hypothetical protein, locus EGR51802), *Neurospora crassa* (NCU07692). Sequences were modified as noted in Fig. 5C before performing the alignment.

## **File S1**

### **Time-lapse imaging of Mag1-GFP**

Video shows time-lapse imaging of Mag1-GFP during mitosis (Fig. 2B). Images were collected every 1 min and are displayed at 2 frames per second (fps). File S1 is available for download as an AVI at <http://www.genetics.org/lookup/suppl/doi:10.1534/genetics.113.156745/-/DC1>.

## **File S2**

### **Time-lapse imaging of SonC-GFP**

Video shows time-lapse imaging of SonC-GFP during mitosis (Fig. 6C). Images were collected every 1 min and are displayed at 2 fps. File S2 is available for download as an AVI at

<http://www.genetics.org/lookup/suppl/doi:10.1534/genetics.113.156745/-/DC1>.

### File S3

#### 3D rotation of SonC-GFP during mitosis

Video shows a 3D rotation over time of SonC-GFP during mitosis (Fig. 6C). Images were collected every 1 min, were rotated in  $10^0$  increments, and are displayed at 25 fps. File S3 is available for download as an AVI file at <http://www.genetics.org/lookup/suppl/doi:10.1534/genetics.113.156745/-/DC1>.

#### **File S4**

##### **Time-lapse imaging of SonC-GFP during SAC arrest**

Video shows time-lapse imaging of SonC-GFP in cells treated with 2.4  $\mu\text{g/ml}$  benomyl during SAC arrest (Fig. 6D).

Images were collected every 1 min and are displayed at 2 fps. File S4 is available for download as an AVI at

<http://www.genetics.org/lookup/suppl/doi:10.1534/genetics.113.156745/-/DC1>.

## File S5

### 3D rotation of SonC-GFP during SAC arrest

Video shows a 3D rotation over time of SonC-GFP during SAC arrest in cells treated with 2.4  $\mu\text{g/ml}$  benomyl (Fig. 6D). Images were collected every 1 min, were rotated in  $10^\circ$  increments, and are displayed at 25 fps. File S5 is available for download as an AVI at <http://www.genetics.org/lookup/suppl/doi:10.1534/genetics.113.156745/-/DC1>.

#### **File S6**

##### **Time-lapse imaging of SonC-GFP and histone H1-mCherry during mitosis**

Video shows time-lapse imaging of SonC-GFP together with histone H1-mCherry during mitosis (Fig. 7A). Images were collected every 1 min and are displayed at 2 fps. File S6 is available for download as an AVI at

<http://www.genetics.org/lookup/suppl/doi:10.1534/genetics.113.156745/-/DC1>.

## File S7

### 3D rotation of SonC-GFP and histone H1-mCherry during mitosis

Video shows a 3D rotation over time of SonC-GFP and histone H1-mCherry during mitosis (Fig. 7A). Images were collected every 1 min, were rotated in  $10^0$  increments, and are displayed at 25 fps. File S7 is available for download as an AVI at <http://www.genetics.org/lookup/suppl/doi:10.1534/genetics.113.156745/-/DC1>.

## File S8

### SonC-GFP and histone H1-mCherry in a hooked projection

Video shows a 3D rotation over time of SonC-GFP together with histone H1-mCherry in nuclei that display a hooked structure (Fig. 7B). Images were collected every 1 min, were rotated in  $10^\circ$  increments, and are displayed at 25 fps.

File S8 is available for download as an AVI at

<http://www.genetics.org/lookup/suppl/doi:10.1534/genetics.113.156745/-/DC1>.

#### **File S9**

##### **Time-lapse imaging of SonC-GFP and histone H1-mCherry in lagging chromosome arms**

Video shows time-lapse imaging of SonC-GFP together with histone H1-mCherry can sometimes be seen as lagging chromosome arms following mitosis (Fig. 7C). Images were collected every 1 min and are displayed at 2 fps. File S9 is available for download as an AVI at <http://www.genetics.org/lookup/suppl/doi:10.1534/genetics.113.156745/-/DC1>.

## **File S10**

### **Time-lapse imaging of SonC-GFP and Bop1-mCherry during mitosis**

Video shows time-lapse imaging of SonC-GFP together with the nucleolar marker Bop1-mCherry during mitosis (Fig. 7D). Images were collected every 1 min and are displayed at 2 frames per second (fps). File S10 is available for download as an AVI at <http://www.genetics.org/lookup/suppl/doi:10.1534/genetics.113.156745/-/DC1>.

## File S11

### 3D rotation of SonC-GFP and Bop1-mCherry during mitosis

Video shows a 3D rotation over time of SonC-GFP and Bop1-mCherry during mitosis (Fig. 7D). Images were collected every 1 min, were rotated in  $10^0$  increments, and are displayed at 25 fps. File S11 is available for download as an AVI at <http://www.genetics.org/lookup/suppl/doi:10.1534/genetics.113.156745/-/DC1>.

## **File S12**

### **Time-lapse imaging of SonC-GFP and Pol I-mCherry during mitosis**

Video shows time-lapse imaging of SonC-GFP together with the NOR marker Pol I-mCherry during mitosis (Fig. 7E).

Images were collected every 1 min and are displayed at 2 frames per second (fps). File S12 is available for download as an AVI at <http://www.genetics.org/lookup/suppl/doi:10.1534/genetics.113.156745/-/DC1>.

**Table S1 Strains Used in This Study**

| NAME   | GENOTYPE                                                                                                                                                                 | SOURCE                        |
|--------|--------------------------------------------------------------------------------------------------------------------------------------------------------------------------|-------------------------------|
| C61    | <i>yA1 nicB8 pyroA4 niiA4 riboB2 veA1</i>                                                                                                                                | (Dowzer and Kelly 1991)       |
| CDS36  | <i>sonB1 nimA1 pyrG89 wA veA1</i>                                                                                                                                        | (De Souza <i>et al.</i> 2003) |
| CDS364 | <i>sonB1 pyroA4 wA3 veA1</i>                                                                                                                                             | (De Souza <i>et al.</i> 2006) |
| CDS509 | <i>sonA1 pyroA4 wA3 yA2<sup>1</sup> veA1</i>                                                                                                                             | This study                    |
| JLA1   | <i>nimA1 pyrG89 wA2/wA3<sup>1</sup> yA2<sup>1</sup> veA1</i>                                                                                                             | This study                    |
| JLA73  | <i>nimA1 mutant D pyrG89 wA2/wA3<sup>?</sup> yA2<sup>1</sup> veA1</i>                                                                                                    | This study                    |
| JLA75  | <i>nimA1 mutant F pyrG89 wA2/wA3<sup>1</sup> yA2<sup>1</sup> veA1</i>                                                                                                    | This study                    |
| JLA77  | <i>nimA1 mutant C (sonC1) pyrG89 wA2/wA3<sup>1</sup> yA2<sup>1</sup> veA1</i>                                                                                            | This study                    |
| JLA78  | <i>nimA1 mutant E pyrG89 wA2/wA3<sup>1</sup> yA2<sup>1</sup> veA1</i>                                                                                                    | This study                    |
| JLA184 | <i>nimA1 mutant 89 pyrG89 wA2/wA3<sup>?</sup> yA2<sup>1</sup> veA1</i>                                                                                                   | This study                    |
| JLA185 | <i>nimA1 sonA2 pyrG89 wA2/wA3<sup>1</sup> yA2<sup>1</sup> veA1</i>                                                                                                       | This study                    |
| JLA227 | <i>sonA2 riboB2 pyroA4 yA2 wA2/wA3<sup>1</sup> veA1</i>                                                                                                                  | This study                    |
| JLA255 | <i>nimA1 sonA3 pyrG89 wA2/wA3<sup>1</sup> yA2<sup>1</sup> veA1</i>                                                                                                       | This study                    |
| JLA263 | <i>mag1-GFP::pyrG<sup>Af</sup> pyrG89 nkuAΔ::argB argB2 pyroA4 SE15</i><br><i>nirA14 chaA1 wA3 fwA1 veA1</i>                                                             | This study                    |
| JLA264 | <i>mag1Δ::pyrG<sup>Af</sup> pyrG89 argB2 nirA14<sup>1</sup> wA3 chaA1<sup>1</sup> fwA1<sup>1</sup> yA2<sup>1</sup></i><br><i>veA1</i>                                    | This study                    |
| JLA265 | <i>sonC-GFP::pyrG<sup>Af</sup> pyrG89 argB2 wA3 nirA14<sup>1</sup> yA2<sup>1</sup> chaA1<sup>1</sup></i><br><i>fwA1<sup>1</sup> veA1</i>                                 | This study                    |
| JLA268 | <i>sonA3 wA3 yA2<sup>1</sup> veA1</i>                                                                                                                                    | This study                    |
| JLA319 | <i>sonC-GFP::pyrG<sup>Af</sup> H1-mCherry::pyroA<sup>af</sup> pyroA4<sup>1</sup> pyrG89 argB2</i><br><i>wA3 yA2<sup>1</sup> chaA1<sup>1</sup> fwA1<sup>1</sup> veA1</i>  | This study                    |
| JLA324 | <i>sonC-GFP::pyrG<sup>Af</sup> bop1-mCherry::pyrG<sup>Af</sup> pyrG89 argB2</i><br><i>nirA14<sup>1</sup> wA3 yA2<sup>1</sup> chaA1<sup>1</sup> fwA1<sup>1</sup> veA1</i> | This study                    |
| JLA325 | <i>sonC-GFP::pyrG<sup>Af</sup> pol I-mCherry::pyrG<sup>Af</sup> pyrG89 argB2 nirA14<sup>1</sup></i><br><i>wA3 yA2<sup>1</sup> chaA1<sup>1</sup> fwA1 veA1</i>            | This study                    |
| KF018  | <i>nimA-GFP::pyrG<sup>AF</sup> H1-mCherry::pyroA<sup>AF</sup> nirA14<sup>1</sup></i><br><i>sE15<sup>1</sup> wA3 veA1</i>                                                 | This study                    |

|       |                                                                                                                                                                            |                           |
|-------|----------------------------------------------------------------------------------------------------------------------------------------------------------------------------|---------------------------|
| KF110 | <i>nimA-GFP::pyrG<sup>AF</sup> nup170-mCherry::pyroA<sup>AF</sup> ΔnKuA::argB</i><br><i>argB2 wA3 veA1</i>                                                                 | This study                |
| KF120 | <i>nimA-GFP::pyrG<sup>AF</sup> pyrG89 fib-mCherry::pyrG<sup>AF</sup> wA3 veA1</i>                                                                                          | This study                |
| KF122 | <i>nimA-GFP::pyrG<sup>AF</sup> pyrG89 topo1-mCherry::pyrG<sup>AF</sup> pyroA4</i><br><i>argB2 wA3 veA1</i>                                                                 | This study                |
| LPW29 | <i>nimA1 sonA1 riboA1/riboB2<sup>1</sup> pyrG89 wA2 veA1</i>                                                                                                               | (Wu <i>et al.</i> 1998)   |
| LU178 | <i>cgrA-GFP::pyrG<sup>AF</sup> H1-mCherry::pyrG<sup>AF</sup> pyrG89 argB2 wA3</i><br><i>nirA14<sup>1</sup> fwaA1<sup>1</sup> chaA1<sup>1</sup> veA1</i>                    | (Ukil <i>et al.</i> 2009) |
| LU193 | <i>bop1-GFP::pyrG<sup>AF</sup> H1-mCherry::pyrG<sup>AF</sup> pyrG89 argB2 wA3</i><br><i>SE15 pabaA1 pyroA4 nirA14<sup>1</sup> fwaA1<sup>1</sup> chaA1<sup>1</sup> veA1</i> | (Ukil <i>et al.</i> 2009) |
| R153  | <i>pyroA4 wA3 veA1</i>                                                                                                                                                     | C. F. Roberts             |
| SO369 | <i>sonA1 pyrG89 wA2 nicA2 veA1</i>                                                                                                                                         | This study                |

---

<sup>1</sup> In some strains we have not confirmed some markers that could be covered by or are recessive to other markers in the strain.

**Table S2 Primers Used in This Study**

| Name        | Purpose                                      | Sequence                                                          |
|-------------|----------------------------------------------|-------------------------------------------------------------------|
| 3'sonBcDNA  | <i>sonB</i> amplification                    | GCTCGAGTCAGATCTCAGTA                                              |
| 5'UTRsonB   | <i>sonB</i> amplification                    | ACGGATGGACGTTGATAACATACTG                                         |
| AF-2        | <i>nimA</i> sequencing                       | GGTGTCACATATGGTACG                                                |
| AF-4        | <i>nimA</i> sequencing                       | GTCATTGCGAGCTGCCT                                                 |
| AF-6        | <i>nimA</i> sequencing                       | CTTGAGTCGCCGACGAA                                                 |
| AF-7        | <i>nimA</i> sequencing                       | AAGATCCCATCGTCCGC                                                 |
| AR-2        | <i>nimA</i> amplification                    | GCAGCAGCGCAAGAAAT                                                 |
| HP15        | <i>nimA</i> GFP-tagging                      | GAACACCATTCTACATGTCTCCAG                                          |
| HP16        | <i>nimA</i> GFP-tagging                      | CCTCAAGTTGCGAATCACCTTTC                                           |
| HP17        | <i>nimA</i> GFP-tagging                      | TGAAAACGCAAGATCGTCCTAACC                                          |
| HP18        | <i>nimA</i> GFP-tagging                      | TGGCGTACGAGCGCTTCAAACCTG                                          |
| HP19        | <i>nimA</i> GFP-tagging                      | GGGGAAGAAAGGTGATTCGCAACTTGAG<br>GGGAGCTGGTGCAGGCGCTGGAGCCAA<br>AG |
| HP20        | <i>nimA</i> GFP-tagging                      | ACCGCCGGTTAGGACGATCTTGCCTTTT<br>CACTGTCTGAGAGGAGGCACTGATGCGT<br>G |
| M13 Forward | pRG3-AMA1-NotI plasmid library<br>sequencing | CTGGCCGTCGTTTAC                                                   |
| NucP1       | <i>sonB</i> sequencing                       | TATTGTAAGGCTGCATGAAC                                              |
| NucP2       | <i>sonB</i> sequencing                       | AACACTGGCAGCTCACTCTT                                              |
| NucP4       | <i>sonB</i> sequencing                       | GGAGTGGACGACGACACATT                                              |
| NucP8       | <i>sonB</i> sequencing                       | AACAACCGCGCAAACAAGGA                                              |
| NucP11      | <i>sonB</i> sequencing                       | GTCCGCAAGCAAGGTCAGAA                                              |
| NucP12      | <i>sonB</i> sequencing                       | CCTCAGATCGTGAAAGGGCT                                              |
| NucP15      | <i>sonB</i> sequencing                       | GCAGTGGCTCAGGCTTTGGT                                              |
| NucP16      | <i>sonB</i> sequencing                       | GGCATCGTTCAGTTCTTCC                                               |
| NucP17      | <i>sonB</i> sequencing                       | TTGGTGGATGCCTTGGTTAC                                              |
| NucP20      | <i>sonB</i> sequencing                       | ATGGAAGTGGGCAGGCAGGA                                              |

|         |                                                        |                                                      |
|---------|--------------------------------------------------------|------------------------------------------------------|
| NucP21  | <i>sonB</i> sequencing                                 | ATTGCTGAGTGTGCTGCCA                                  |
| NucP23  | <i>sonB</i> sequencing                                 | GGCACAGCTGCTACTTCGTC                                 |
| NucP24  | <i>sonB</i> sequencing                                 | ACGTGCTCCTCTGCCAATCT                                 |
| NucP26  | <i>sonB</i> sequencing                                 | CGGCCAGTGTACCCACACAA                                 |
| NucP27  | <i>sonB</i> sequencing                                 | GGCATTACCGCTGATGAACC                                 |
| NucP28  | <i>sonB</i> sequencing                                 | GGCCACCTTGGACGGATTCT                                 |
| NucP32  | <i>sonB</i> sequencing                                 | CCTGCGAAGGTCTTTGGCTG                                 |
| NucP34  | <i>sonB</i> sequencing                                 | ACTCGTACGACCGATCCTC                                  |
| oMN33   | pRG3-AMA1-NotI plasmid library sequencing              | AAATAAGCTTGCATGCGC                                   |
| SP204-F | AN4389 amplification                                   | CAAGCATTGACCGATGACACT                                |
| SP205-R | AN4389 amplification                                   | GCTCTCATTAAGTCAATCCAGCAT                             |
| SP206-F | AN4389 sequencing                                      | CCGGATTCTGATTGCTAAGGC                                |
| SP207-F | AN4389 sequencing                                      | GTGGACAACCGAGAATCTCA                                 |
| SP209-F | AN4389 sequencing                                      | CGACAACTGGCACGCTTC                                   |
| SP233-F | <i>nimA</i> sequencing                                 | CGACTACTAACCTGCAGA                                   |
| SP234-F | <i>nimA</i> amplification                              | CCCGTGCATTGATATTGACTCC                               |
| SP251   | <i>sonC</i> amplification and deletion                 | CACCAGAGCACCGAAATTGC                                 |
| SP252   | <i>sonC</i> deletion and GFP-tagging                   | CCAGGTCGAGAATTGTCCTTG                                |
| SP253-F | <i>sonC</i> sequencing                                 | CGGAGCGATAAATCTACGTCT                                |
| SP254-F | <i>sonC</i> sequencing                                 | GGACTAAATGTGCTGGCCG                                  |
| SP255-F | <i>sonC</i> amplification, GFP-tagging, and sequencing | CTGCATGGAACCAACAGCT                                  |
| SP256-F | <i>sonC</i> sequencing                                 | GATCTGCATGCGACGTTAGC                                 |
| SP257-F | <i>sonC</i> sequencing                                 | CGCAGCCTACAGATGACGG                                  |
| SP258-F | <i>sonC</i> deletion and GFP-tagging                   | GCATCAGTGCCTCCTCTCAGACAGATGGCAACAGTTGTG<br>GAAGTATGC |
| SP259-R | <i>sonC</i> deletion                                   | GAAGAGCATTGTTTGAGGCGGACGAGATCGCGTGGCAG<br>AATATAT    |
| SP260-R | <i>sonC</i> GFP-tagging                                | GGCTCCAGCGCCTGCACCAGCTCCCGCATAGACATTGCA<br>GGCGGCAGC |

|      |                                          |                       |
|------|------------------------------------------|-----------------------|
| SPF1 | <i>sonA</i> amplification and sequencing | GCTCTTGATACCCGTCTCTC  |
| SPF2 | <i>sonA</i> sequencing                   | GTACATCAATATAGTCGACCT |
| SPF5 | <i>sonA</i> sequencing                   | CTGCTGCTGGTCACCTGTAAG |
| SPR5 | <i>sonA</i> amplification and sequencing | CGTGACTGTCTATACGTGCG  |
| SPR8 | <i>sonA</i> sequencing                   | CGAGATCGAGCATACGAGCC  |

---
