# Supplementary material
Source: PubMed Central journal article supplement (PMC3872184)
Supplement: supp_113.156745_FigureS1.pdf [file supp_113.156745_FigureS1.pdf]

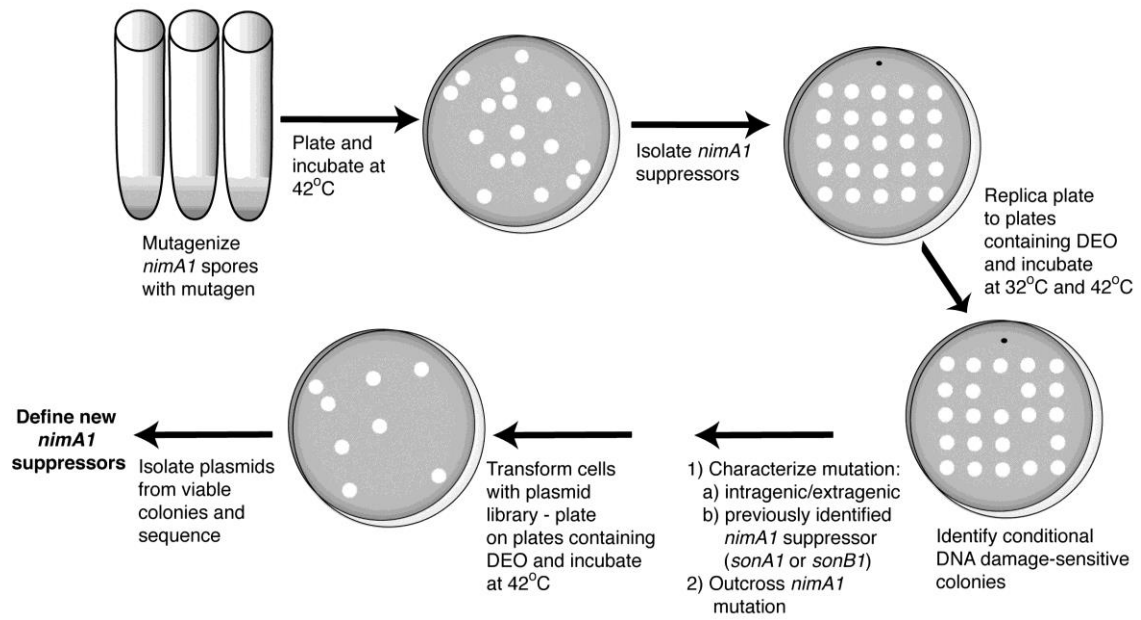

**Figure S1** Methods used to identify conditional drug-sensitive suppressors of *nimA1*. Diagram of the genetic screen performed and the general steps involved to identify suppressors of *nimA1* temperature sensitivity.
