# Supplementary material
Source: PubMed Central journal article supplement (PMC3872184)
Supplement: supp_113.156745_TableS1.pdf [file supp_113.156745_TableS1.pdf]

**Table S1 Strains Used in This Study**

| NAME   | GENOTYPE                                                                                                                                                                  | SOURCE                        |
|--------|---------------------------------------------------------------------------------------------------------------------------------------------------------------------------|-------------------------------|
| C61    | <i>yA1 nicB8 pyroA4 niiA4 riboB2 veA1</i>                                                                                                                                 | (Dowzer and Kelly 1991)       |
| CDS36  | <i>sonB1 nimA1 pyrG89 wA veA1</i>                                                                                                                                         | (De Souza <i>et al.</i> 2003) |
| CDS364 | <i>sonB1 pyroA4 wA3 veA1</i>                                                                                                                                              | (De Souza <i>et al.</i> 2006) |
| CDS509 | <i>sonA1 pyroA4 wA3 yA2<sup>1</sup> veA1</i>                                                                                                                              | This study                    |
| JLA1   | <i>nimA1 pyrG89 wA2/wA3<sup>1</sup> yA2<sup>1</sup> veA1</i>                                                                                                              | This study                    |
| JLA73  | <i>nimA1 mutant D pyrG89 wA2/wA3<sup>?</sup> yA2<sup>1</sup> veA1</i>                                                                                                     | This study                    |
| JLA75  | <i>nimA1 mutant F pyrG89 wA2/wA3<sup>1</sup> yA2<sup>1</sup> veA1</i>                                                                                                     | This study                    |
| JLA77  | <i>nimA1 mutant C (sonC1) pyrG89 wA2/wA3<sup>1</sup> yA2<sup>1</sup> veA1</i>                                                                                             | This study                    |
| JLA78  | <i>nimA1 mutant E pyrG89 wA2/wA3<sup>1</sup> yA2<sup>1</sup> veA1</i>                                                                                                     | This study                    |
| JLA184 | <i>nimA1 mutant 89 pyrG89 wA2/wA3<sup>?</sup> yA2<sup>1</sup> veA1</i>                                                                                                    | This study                    |
| JLA185 | <i>nimA1 sonA2 pyrG89 wA2/wA3<sup>1</sup> yA2<sup>1</sup> veA1</i>                                                                                                        | This study                    |
| JLA227 | <i>sonA2 riboB2 pyroA4 yA2 wA2/wA3<sup>1</sup> veA1</i>                                                                                                                   | This study                    |
| JLA255 | <i>nimA1 sonA3 pyrG89 wA2/wA3<sup>1</sup> yA2<sup>1</sup> veA1</i>                                                                                                        | This study                    |
| JLA263 | <i>mag1-GFP::pyrG<sup>Af</sup> pyrG89 nkuAΔ::argB argB2 pyroA4 SE15</i><br><i>nirA14 chaA1 wA3 fwA1 veA1</i>                                                              | This study                    |
| JLA264 | <i>mag1Δ::pyrG<sup>Af</sup> pyrG89 argB2 nirA14<sup>1</sup> wA3 chaA1<sup>1</sup> fwA1<sup>1</sup> yA2<sup>1</sup></i><br><i>veA1</i>                                     | This study                    |
| JLA265 | <i>sonC-GFP::pyrG<sup>Af</sup> pyrG89 argB2 wA3 nirA14<sup>1</sup> yA2<sup>1</sup> chaA1<sup>1</sup></i><br><i>fwA1<sup>1</sup> veA1</i>                                  | This study                    |
| JLA268 | <i>sonA3 wA3 yA2<sup>1</sup> veA1</i>                                                                                                                                     | This study                    |
| JLA319 | <i>sonC-GFP::pyrG<sup>Af</sup> H1-mCherry::pyro<sup>Af</sup> pyroA4<sup>1</sup> pyrG89 argB2</i><br><i>wA3 yA2<sup>1</sup> chaA1<sup>1</sup> fwA1<sup>1</sup> veA1</i>    | This study                    |
| JLA324 | <i>sonC-GFP::pyrG<sup>Af</sup> bop1-mCherry::pyrG<sup>Af</sup> pyrG89 argB2</i><br><i>nirA14<sup>1</sup> wA3 yA2<sup>1</sup> chaA1<sup>1</sup> fwA1<sup>1</sup> veA1</i>  | This study                    |
| JLA325 | <i>sonC-GFP::pyrG<sup>Af</sup> pol I-mCherry::pyrG<sup>Af</sup> pyrG89 argB2 nirA14<sup>1</sup></i><br><i>wA3 yA2<sup>1</sup> chaA1<sup>1</sup> fwA1<sup>1</sup> veA1</i> | This study                    |
| KF018  | <i>nimA-GFP::pyrG<sup>Af</sup> H1-mCherry::pyro<sup>Af</sup> nirA14<sup>1</sup></i><br><i>sE15<sup>1</sup> wA3 veA1</i>                                                   | This study                    |

---

|       |                                                                                                                                                                      |                           |
|-------|----------------------------------------------------------------------------------------------------------------------------------------------------------------------|---------------------------|
| KF110 | <i>nimA-GFP::pyrG<sup>AF</sup> nup170-mCherry::pyroA<sup>AF</sup> ΔnKuA::argB<br/>argB2 wA3 veA1</i>                                                                 | This study                |
| KF120 | <i>nimA-GFP::pyrG<sup>AF</sup> pyrG89 fib-mCherry::pyrG<sup>AF</sup> wA3 veA1</i>                                                                                    | This study                |
| KF122 | <i>nimA-GFP::pyrG<sup>AF</sup> pyrG89 topo1-mCherry::pyrG<sup>AF</sup> pyroA4<br/>argB2 wA3 veA1</i>                                                                 | This study                |
| LPW29 | <i>nimA1 sonA1 riboA1/riboB2<sup>1</sup> pyrG89 wA2 veA1</i>                                                                                                         | (Wu <i>et al.</i> 1998)   |
| LU178 | <i>cgrA-GFP::pyrG<sup>AF</sup> H1-mCherry::pyrG<sup>AF</sup> pyrG89 argB2 wA3<br/>nirA14<sup>1</sup> fwaA1<sup>1</sup> chaA1<sup>1</sup> veA1</i>                    | (Ukil <i>et al.</i> 2009) |
| LU193 | <i>bop1-GFP::pyrG<sup>AF</sup> H1-mCherry::pyrG<sup>AF</sup> pyrG89 argB2 wA3<br/>SE15 pabaA1 pyroA4 nirA14<sup>1</sup> fwaA1<sup>1</sup> chaA1<sup>1</sup> veA1</i> | (Ukil <i>et al.</i> 2009) |
| R153  | <i>pyroA4 wA3 veA1</i>                                                                                                                                               | C. F. Roberts             |
| SO369 | <i>sonA1 pyrG89 wA2 nicA2 veA1</i>                                                                                                                                   | This study                |

---

<sup>1</sup> In some strains we have not confirmed some markers that could be covered by or are recessive to other markers in the strain.
