# Supplementary material
Source: PubMed Central journal article supplement (PMC3872184)
Supplement: supp_113.156745_TableS2.pdf [file supp_113.156745_TableS2.pdf]

**Table S2 Primers Used in This Study**

| Name        | Purpose                                      | Sequence                                                          |
|-------------|----------------------------------------------|-------------------------------------------------------------------|
| 3'sonBcDNA  | <i>sonB</i> amplification                    | GCTCGAGTCAGATCTCAGTA                                              |
| 5'UTRsonB   | <i>sonB</i> amplification                    | ACGGATGGACGTTGATAACATACTG                                         |
| AF-2        | <i>nimA</i> sequencing                       | GGTGTCACATATGGTACG                                                |
| AF-4        | <i>nimA</i> sequencing                       | GTCATTGCGAGCTGCCT                                                 |
| AF-6        | <i>nimA</i> sequencing                       | CTTGAGTCGCCGACGAA                                                 |
| AF-7        | <i>nimA</i> sequencing                       | AAGATCCCATCGTCCGC                                                 |
| AR-2        | <i>nimA</i> amplification                    | GCAGCAGCGCAAGAAAT                                                 |
| HP15        | <i>nimA</i> GFP-tagging                      | GAACACCATTCTACATGTCTCCAG                                          |
| HP16        | <i>nimA</i> GFP-tagging                      | CCTCAAGTTGCGAATCACCTTTC                                           |
| HP17        | <i>nimA</i> GFP-tagging                      | TGAAAACGCAAGATCGTCCTAACC                                          |
| HP18        | <i>nimA</i> GFP-tagging                      | TGGCGTACGAGCGCTTCAAACCTG                                          |
| HP19        | <i>nimA</i> GFP-tagging                      | GGGGAAGAAAGGTGATTCGCAACTTGAG<br>GGGAGCTGGTGCAGGCGCTGGAGCCAA<br>AG |
| HP20        | <i>nimA</i> GFP-tagging                      | ACCGCCGTTAGGACGATCTTGCCTTTT<br>CACTGTCTGAGAGGAGGCACTGATGCGT<br>G  |
| M13 Forward | pRG3-AMA1-NotI plasmid library<br>sequencing | CTGGCCGTCGTTTTAC                                                  |
| NucP1       | <i>sonB</i> sequencing                       | TATTGTAAGGCTGCATGAAC                                              |
| NucP2       | <i>sonB</i> sequencing                       | AACACTGGCAGCTCACTCTT                                              |
| NucP4       | <i>sonB</i> sequencing                       | GGAGTGGACGACGACACATT                                              |
| NucP8       | <i>sonB</i> sequencing                       | AACAACCGCGCAAACAAGGA                                              |
| NucP11      | <i>sonB</i> sequencing                       | GTCCGCAAGCAAGGTCAGAA                                              |
| NucP12      | <i>sonB</i> sequencing                       | CCTCAGATCGTGAAAGGGCT                                              |
| NucP15      | <i>sonB</i> sequencing                       | GCAGTGGCTCAGGCTTTGGT                                              |
| NucP16      | <i>sonB</i> sequencing                       | GGCATCGTTCAGTTCTTCC                                               |
| NucP17      | <i>sonB</i> sequencing                       | TTGGTGGATGCCTTGGTTAC                                              |
| NucP20      | <i>sonB</i> sequencing                       | ATGGAAGTGGCAGGCAGGA                                               |

|         |                                                        |                                                       |
|---------|--------------------------------------------------------|-------------------------------------------------------|
| NucP21  | <i>sonB</i> sequencing                                 | ATTGCTGAGTGTGCTGCCA                                   |
| NucP23  | <i>sonB</i> sequencing                                 | GGCACAGCTGCTACTTCGTC                                  |
| NucP24  | <i>sonB</i> sequencing                                 | ACGTGCTCCTCTGCCAATCT                                  |
| NucP26  | <i>sonB</i> sequencing                                 | CGGCCAGTGTACCCACACAA                                  |
| NucP27  | <i>sonB</i> sequencing                                 | GGCATTACCGCTGATGAACC                                  |
| NucP28  | <i>sonB</i> sequencing                                 | GGCCACCTTGGACGGATTCT                                  |
| NucP32  | <i>sonB</i> sequencing                                 | CCTGCGAAGGTCTTTGGCTG                                  |
| NucP34  | <i>sonB</i> sequencing                                 | ACTCGTACGACCGATCCTC                                   |
| oMN33   | pRG3-AMA1-NotI plasmid library sequencing              | AAATAAGCTTGCATGCGC                                    |
| SP204-F | AN4389 amplification                                   | CAAGCATTGACCGATGACACT                                 |
| SP205-R | AN4389 amplification                                   | GCTCTCATTAAGTCAATCCAGCAT                              |
| SP206-F | AN4389 sequencing                                      | CCGGATTCTGATTGCTAAGGC                                 |
| SP207-F | AN4389 sequencing                                      | GTGGACAACCGAGAATCTCA                                  |
| SP209-F | AN4389 sequencing                                      | CGACAACCTGGCACGCTTC                                   |
| SP233-F | <i>nimA</i> sequencing                                 | CGACTACTAACCTGCAGA                                    |
| SP234-F | <i>nimA</i> amplification                              | CCCGTGCATTGATATTGACTCC                                |
| SP251   | <i>sonC</i> amplification and deletion                 | CACCAGAGCACCGAAATTGC                                  |
| SP252   | <i>sonC</i> deletion and GFP-tagging                   | CCAGGTCGAGAATTGTCCTTG                                 |
| SP253-F | <i>sonC</i> sequencing                                 | CGGAGCGATAAATCTACGTCT                                 |
| SP254-F | <i>sonC</i> sequencing                                 | GGACTAAATGTGCTGGCCG                                   |
| SP255-F | <i>sonC</i> amplification, GFP-tagging, and sequencing | CTGCATGGAACCAACAGCT                                   |
| SP256-F | <i>sonC</i> sequencing                                 | GATCTGCATGCGACGTTAGC                                  |
| SP257-F | <i>sonC</i> sequencing                                 | CGCAGCCTACAGATGACGG                                   |
| SP258-F | <i>sonC</i> deletion and GFP-tagging                   | GCATCAGTGCCTCCTCTCAGACAGATGGCAACAGTTGTGT<br>GAAGTATGC |
| SP259-R | <i>sonC</i> deletion                                   | GAAGAGCATTGTTTGAGGCGGACGAGATCGCGTGGCAG<br>AATATAT     |
| SP260-R | <i>sonC</i> GFP-tagging                                | GGCTCCAGCGCCTGCACCAGCTCCCGCATAGACATTTGCA<br>GGCGGCAGC |

|      |                                          |                       |
|------|------------------------------------------|-----------------------|
| SPF1 | <i>sonA</i> amplification and sequencing | GCTCTTGATACCCGTCTCTC  |
| SPF2 | <i>sonA</i> sequencing                   | GTACATCAATATAGTCGACCT |
| SPF5 | <i>sonA</i> sequencing                   | CTGCTGCTGGTCACCTGTAAG |
| SPR5 | <i>sonA</i> amplification and sequencing | CGTGACTGTCTATACGTGCG  |
| SPR8 | <i>sonA</i> sequencing                   | CGAGATCGAGCATACGAGCC  |

---
